# Supplementary material
Source: Research Square preprint supplement (doi:10.21203/rs.3.rs-9548814/v1)
Supplement: Supplementary file 1 [file 071ec560b70b1ed970047d4d.docx]

**Supporting Information**


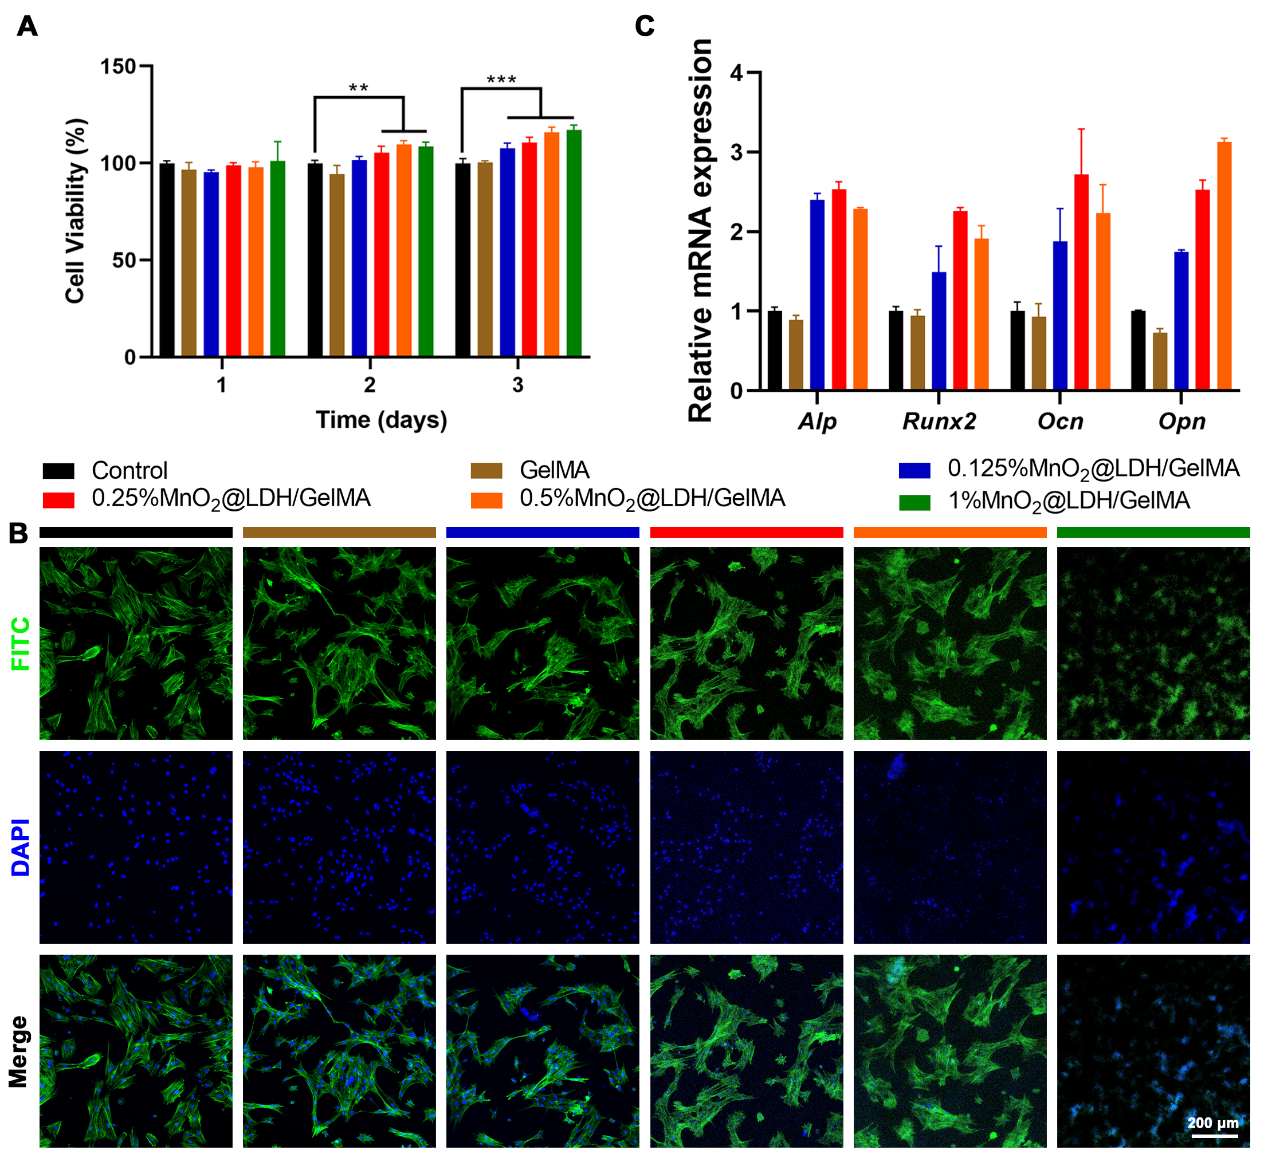


**Fig. S1.** Optimization of MnO2@LDHs loading concentration in the GelMA hydrogel. **(A)** CCK-8 cell viability assay of BMSCs cultured on the composite hydrogels with different concentrations of MnO2@LDHs (n=4). (B) Cytoskeletal spreading morphology of BMSCs via FITC-phalloidin staining. **(C)** qPCR analysis of osteogenic marker genes in BMSCs (n=4).


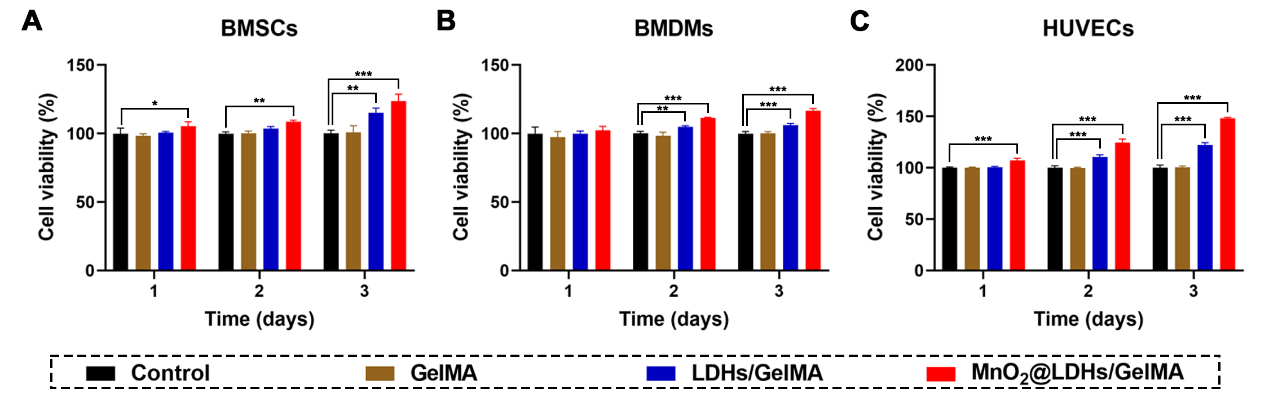


**Fig. S2.** Cytocompatibility evaluation of the composite hydrogels. CCK-8 cell viability assays of **(A)** BMSCs, **(B)** BMDMs, and **(C)** HUVECs cultured on different hydrogels for 1, 2, and 3 days (n=4).


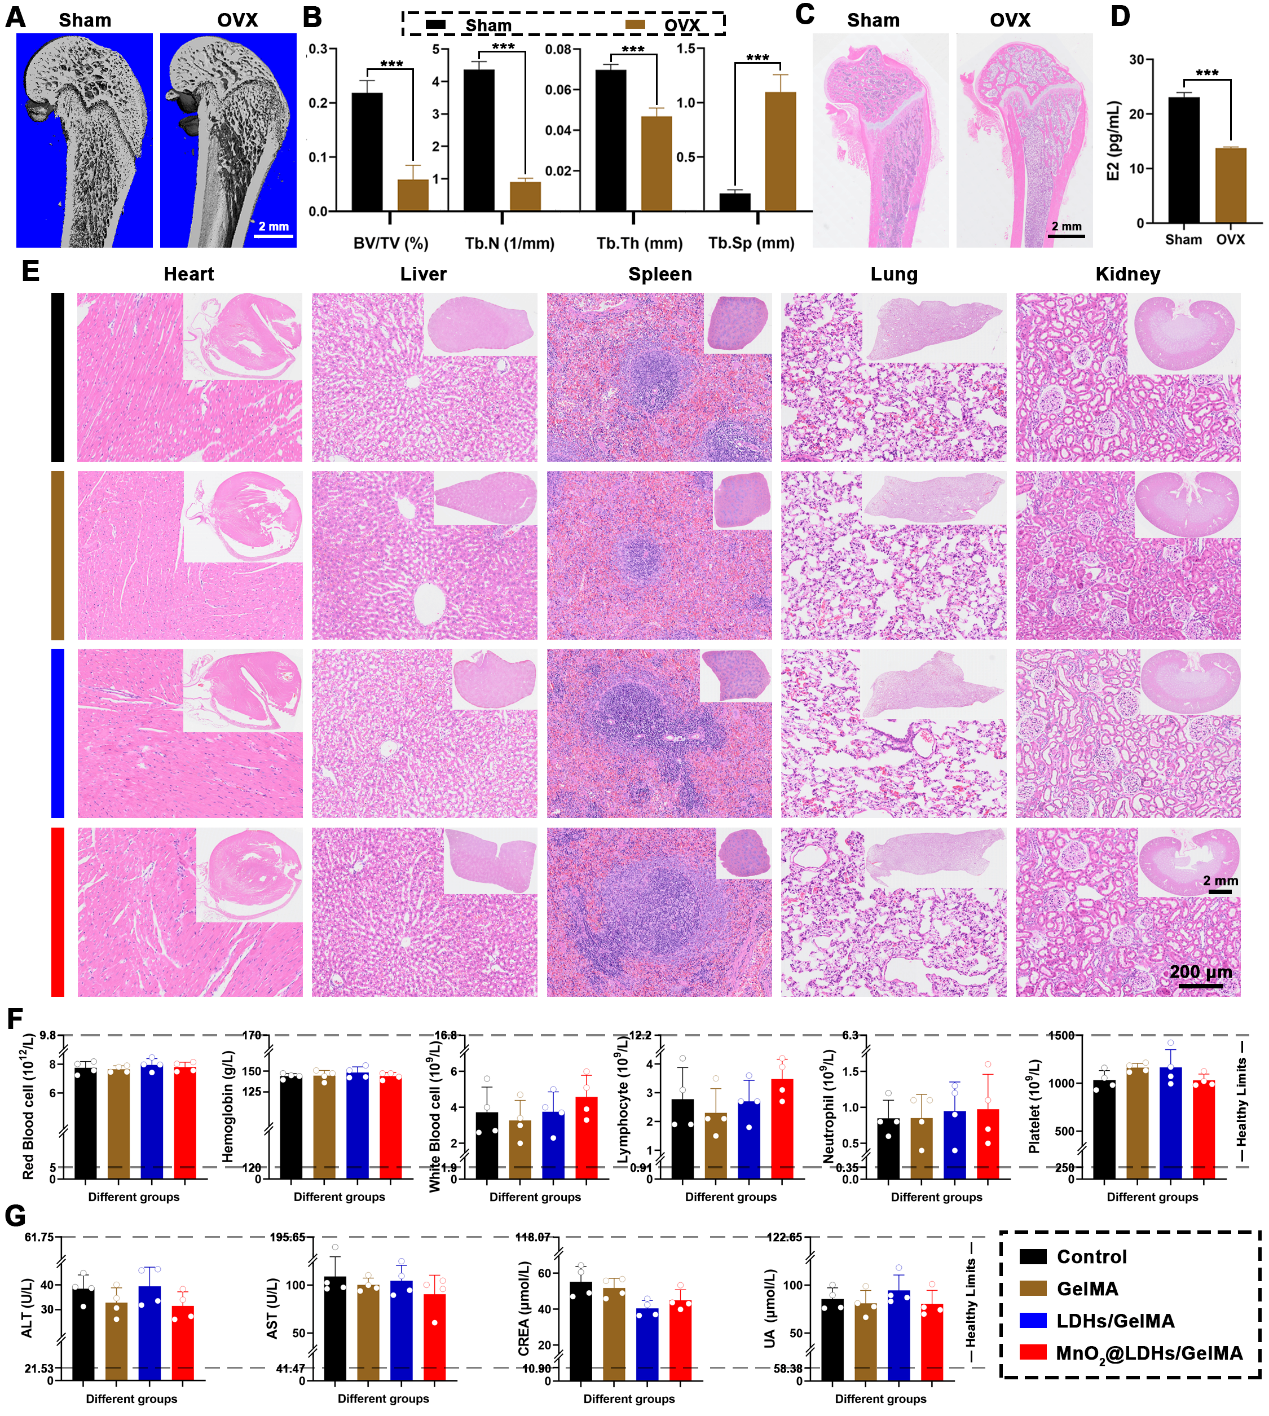


**Fig. S3.** Validation of the OP rat model and systemic biosafety evaluation *in vivo*. **(A)** 3D micro-CT reconstructions and **(B)** quantitative morphometric analysis of distal femurs in Sham and OVX rats (n=4). **(C)** H&E staining images of distal femurs in Sham and OVX rats. **(D)** ELISA quantification of serum E2 levels (n=4). **(E)** H&E staining images of major vital organs at 8 weeks post-implantation. **(F)** Routine blood parameters and **(G)** serum biochemical markers evaluation at 8 weeks post-implantation (n=4).

**Table S1.** Sequences of primers used for qPCR detection.

| Gene | | Forward sequence (5’-3’) | Reverse sequence (5’-3’) |
| --- | --- | --- | --- |
| Rat | *Alp* | AACGTGGCCAAGAACATCATCA | TGTCCATCTCCAGCCGTGTC |
| *Runx2* | CCATAACGGTCTTCACAAATCCT | TCTGTCTGTGCCTTCTTGGTTC |
| *Opn* | TTGGCTTTGCAGTCTCCTGCGG | AGGCAAGGCCGAACAGGCAAA |
| *Ocn* | GGTGCAGACCTAGCAGACACCA | AGGTAGCGCCGGAGTCTATTCA |
| *Nfatc1* | CTTCCAAGTTTCCACTCGGC | ACGCATAACTGTAGTGTTCTTCC |
| *Mmp9* | GCTTCTGTCCTACTCGAGCC | ACAGGCTGTACCCTTGGTCT |
| *Ctsk* | CTGTGGAAGAAGACCCACGG | ACTTCTTCGCTGGTCATGTCT |
| *Acp5* | CTCTTCTACTGAGAGGTGCGAG | ACCATCCACGTATCCATCACC |
| *Il-1β* | CAGCTTTCGACAGTGAGGAGA | TTGTCGAGATGCTGCTGTGA |
| *Il-6* | AGAGACTTCCAGCCAGTTGC | TGCCATTGCACAACTCTTTTC |
| *iNos* | GAAGGTCGCCAGTCGCGT | TTGCAAGAGATATCCGAGGTGG |
| *Tnf-α* | GATCGGTCCCAACAAGGAGG | CTTGGTGGTTTGCTACGACG |
| *Arg1* | TGTGCCCTCTGTCTTTTAGG | CTCCTCGAGGCTGTCCCT |
| *Il-10* | CCTCTGGATACAGCTGCGAC | TAGACACCTTTGTCTTGGAGCTTA |
| *Cd206* | CGCTGTTCAACTCTTGGACTC | CTGAACGGAGATGGCGCTTA |
| *Tgf-β* | CTGGAAAGGGCTCAACACCT | CTTCTCTGTGGAGCTGAAGCA |
| *Sirt1* | CCCAGATCCTCAAGCCATGTT | TGCTTCAATGCTGTTTCTTCTTT |
| *Sod2* | GCAAGGAACCACAGGCCTTA | TACAAAACACCCACCACGGG |
| *Cat* | GCTCCGCAATCCTACACCAT | GGACATCGGGTTTCTGAGGG |
| *Gapdh* | AGTGCCAGCCTCGTCTCATA | TGAACTTGCCGTGGGTAGAG |
| Human | *SIRT1* | GCTCGCCTTGCTGTGGACTTC | GTGACACAGAGATGGCTGGAACTG |
| *SOD2* | GCTGGAGGCTATCAAGCGTGAC | TTAGAGCAGGCGGCAATCTGTAAG |
| *CAT* | GTGCGGAGATTCAACACTGCCA | CGGCAATGTTCTCACACAGACG |
| *GAPDH* | GGAGCGAGATCCCTCCAAAAT | GGCTGTTGTCATACTTCTCATGG |

**Table S2.** Primary antibody name, source manufacturer and catalog number.

| **Primary antibody** | **Manufacture and catalog number** |
| --- | --- |
| iNOS | Proteintech, 18985-1-AP |
| CD86 | MCE, HY-P80609 |
| CD206 | Proteintech, 18704-1-AP |
| OCN | Epizyme, P106951 |
| CD31 | Servicebio, GB11063-2 |
